# Supplementary material for: Insularity and Aridity as Drivers of Mandibular Disparity in Thylamys elegans (Waterhouse, 1839) from Populations of the Atacama Desert, Chile
Source: MDPI journal article supplement (doi:10.3390/ani12091179), 2022-05-04

## SUPPORTING INFORMATION

**Table S1.** Summary of individuals used in each analysis. GM: Geometric Morphometrics MP: Mechanical potential; LM: Linear measurements

|      |                      |      |       |                         | GM   |       | MP   |       | LM   |       |                              |
|------|----------------------|------|-------|-------------------------|------|-------|------|-------|------|-------|------------------------------|
| CODE | LOCALITY             | LEFT | RIGHT | CATEGORY                | LEFT | RIGHT | LEFT | RIGHT | LEFT | RIGHT | COORDENATES                  |
| CHA  | isla Chañaral        | 13   | 6     | Island population       | 11   | 6     | 10   | 4     | 13   | 6     | 29°02'21.69"S;71°34'12.38"O  |
| CHO  | isla Choros          | 3    | 6     | Island population       | 2    | 6     | 2    | 4     | 3    | 5     | 29°15'53.38"S; 71°32'24,10"O |
| IGV  | isla Gaviota         | 1    | 3     | Island population       | 0    | 2     | 1    | 2     | 1    | 3     | 29°15'40.04"S;71°28'48.71"O  |
| PCC  | Punta Choros         | 2    | 2     | <i>T.e.coquimbensis</i> | 2    | 2     | 2    | 2     | 2    | 2     | 29°14'49.09"S;71°27'28.62"O  |
| PAC  | Pan de Azúcar        | 0    | 1     | <i>T.e.coquimbensis</i> | 0    | 1     | 0    | 1     | 0    | 1     | 26°09'45.74"S;70°39'08.99"O  |
| SMC  | Salamanca            | 1    | 1     | <i>T.e.coquimbensis</i> | 1    | 1     | 1    | 1     | 1    | 1     | 31°47'2.35"S;70°57'10.30"O   |
| VIL  | Los Vilos            | 2    | 2     | <i>T.e.coquimbensis</i> | 1    | 1     | 1    | 1     | 2    | 1     | 31°54'43.87"S;71°30'40.33"O  |
| QLP  | Quebrada de la plata | 15   | 15    | <i>T. e.elegans</i>     | 14   | 15    | 14   | 14    | 15   | 13    | 33°29'40.80"S; 70°54'38.28"O |
| VLP  | Valparaíso, Peñuelas | 3    | 3     | <i>T. e.elegans</i>     | 3    | 3     | 3    | 3     | 3    | 3     | 33°08'57.90"S; 71°33'37.31"O |
| MEL  | El melón             | 5    | 4     | <i>T. e.elegans</i>     | 4    | 4     | 5    | 4     | 5    | 4     | 32°42'08.94"S;71°13'11.85"O  |
| BAT  | Batuco               | 1    | 1     | <i>T. e.elegans</i>     | 1    | 1     | 1    | 1     | 1    | 1     | 33°11'49.86"S; 70°50'8.77"O  |
| PAN  | Panul                | 2    | 3     | <i>T. e.elegans</i>     | 2    | 3     | 2    | 3     | 2    | 3     | 33°32'06.21"S; 70°33'02.98"O |
|      | TOTAL                | 48   | 47    |                         | 41   | 45    | 42   | 40    | 48   | 43    |                              |

**Table S2.** Eigenvalues, Principal component analyses.

| CA eigeevalues left side (Geometric morphometrics) |             |            |              | PCA eigeevalues right side (Geometric morphometrics) |            |              |        |
|----------------------------------------------------|-------------|------------|--------------|------------------------------------------------------|------------|--------------|--------|
|                                                    | Eigenvalues | % Variance | Cumulative % | Eigenvalues                                          | % Variance | Cumulative % |        |
| 1.                                                 | 0,00053574  | 30,408     | 30,408       | 1.                                                   | 0,00055059 | 30,876       | 30,876 |
| 2.                                                 | 0,00032199  | 18,276     | 48,684       | 2.                                                   | 0,00033404 | 18,732       | 49,608 |
| 3.                                                 | 0,00024678  | 14,007     | 62,69        | 3.                                                   | 0,00022942 | 12,865       | 62,474 |
| 4.                                                 | 0,0001519   | 8,622      | 71,312       | 4.                                                   | 0,00015064 | 8,448        | 70,921 |
| 5.                                                 | 0,0000926   | 5,256      | 76,568       | 5.                                                   | 0,00011743 | 6,585        | 77,507 |
| 6.                                                 | 0,00008045  | 4,566      | 81,134       | 6.                                                   | 0,00008202 | 4,6          | 82,106 |
| 7.                                                 | 0,00007098  | 4,029      | 85,163       | 7.                                                   | 0,00005891 | 3,304        | 85,41  |
| 8.                                                 | 0,00005538  | 3,143      | 88,306       | 8.                                                   | 0,0000518  | 2,905        | 88,315 |
| 9.                                                 | 0,00003493  | 1,982      | 90,289       | 9.                                                   | 0,00003648 | 2,046        | 90,361 |
| 10.                                                | 0,00003185  | 1,808      | 92,097       | 10.                                                  | 0,0000315  | 1,766        | 92,127 |
| 11.                                                | 0,00002788  | 1,583      | 93,679       | 11.                                                  | 0,00002655 | 1,489        | 93,616 |
| 12.                                                | 0,0000201   | 1,141      | 94,82        | 12.                                                  | 0,00002333 | 1,308        | 94,924 |
| 13.                                                | 0,00001897  | 1,076      | 95,896       | 13.                                                  | 0,00001958 | 1,098        | 96,022 |
| 14.                                                | 0,00001817  | 1,031      | 96,928       | 14.                                                  | 0,00001446 | 0,811        | 96,833 |
| 15.                                                | 0,00001365  | 0,775      | 97,703       | 15.                                                  | 0,00001203 | 0,675        | 97,508 |
| 16.                                                | 0,00001043  | 0,592      | 98,295       | 16.                                                  | 0,00001055 | 0,592        | 98,1   |
| 17.                                                | 0,00000658  | 0,373      | 98,668       | 17.                                                  | 0,00000753 | 0,422        | 98,522 |
| 18.                                                | 0,00000613  | 0,348      | 99,016       | 18.                                                  | 0,00000726 | 0,407        | 98,929 |
| 19.                                                | 0,00000446  | 0,253      | 99,269       | 19.                                                  | 0,00000635 | 0,356        | 99,285 |
| 20.                                                | 0,00000399  | 0,226      | 99,495       | 20.                                                  | 0,00000415 | 0,232        | 99,517 |
| 21.                                                | 0,00000294  | 0,167      | 99,662       | 21.                                                  | 0,00000366 | 0,205        | 99,723 |
| 22.                                                | 0,00000221  | 0,126      | 99,788       | 22.                                                  | 0,00000166 | 0,093        | 99,816 |
| 23.                                                | 0,0000019   | 0,108      | 99,895       | 23.                                                  | 0,00000146 | 0,082        | 99,898 |
| 24.                                                | 0,00000099  | 0,056      | 99,951       | 24.                                                  | 0,00000103 | 0,058        | 99,955 |
| 25.                                                | 0,00000063  | 0,036      | 99,987       | 25.                                                  | 0,00000054 | 0,03         | 99,986 |
| 26.                                                | 0,00000023  | 0,013      | 100          | 26.                                                  | 0,00000025 | 0,014        | 100    |

**Table S3.** Results of T analyses (right side). **i** = insular; **c** = coquimbensis; **e** = elegans

| LEFT SIDE               |           |           |                | RIGHT SIDE             |           |           |               |
|-------------------------|-----------|-----------|----------------|------------------------|-----------|-----------|---------------|
| Comparation             | Measure   | Analyses  | P              | Comparation            | Measure   | Analyses  | P             |
| Island - T. elegans     | Ángulo A  | t-test    | <b>0,03</b>    | Islas - T. elegans     | Ángulo A  | t-test    | <b>0,03</b>   |
| Island - T. elegans     | Ángulo B  | t-test    | <b>0,007</b>   | Islas - T. elegans     | Ángulo B  | t-test    | <b>0,001</b>  |
| Island - T. elegans     | MP        | t-test    | <b>0,03</b>    | Islas - T. elegans     | MP        | t-test    | <b>0,007</b>  |
| Island - T. elegans     | Centroide | t-test    | <b>0,016</b>   | Islas - T. elegans     | Centroide | t-test    | <b>0,0003</b> |
| Island - T. elegans     | PCL       | t-test    | <b>0,002</b>   | Islas - T. elegans     | PCL       | t-test    | <b>0,0001</b> |
| Island - T. elegans     | CDR       | t-test    | <b>0,0001</b>  | Islas - T. elegans     | CDR       | t-test    | <b>0,0001</b> |
| Island - T. elegans     | MRL       | t-test    | <b>0,0003</b>  | Islas - T. elegans     | MRL       | t-test    | <b>0,003</b>  |
| Island - T. elegans     | ACW       | t-test    | 0,1            | Islas - T. elegans     | ACW       | t-test    | 0,3           |
| Island - T. elegans     | PCW       | t-test    | 0,6            | Islas - T. elegans     | PCW       | t-test    | 0,1           |
| Island - T. elegans     |           | PERMANOVA | <b>0,02</b>    | Islas - T. elegans     |           | PERMANOVA | <b>0,02</b>   |
| LEFT SIDE               |           |           |                | RIGHT SIDE             |           |           |               |
| Comparation             | Measure   | Analyses  | P              | Comparation            | Measure   | Analyses  | P             |
| Island - T.coquimbensis | Ángulo A  | t-test    | <b>0,00005</b> | Islas - T.coquimbensis | Ángulo A  | t-test    | <b>0,02</b>   |
| Island - T.coquimbensis | Ángulo B  | t-test    | <b>0,03</b>    | Islas - T.coquimbensis | Ángulo B  | t-test    | <b>0,008</b>  |
| Island - T.coquimbensis | MP        | t-test    | <b>0,002</b>   | Islas - T.coquimbensis | MP        | t-test    | <b>0,002</b>  |
| Island - T.coquimbensis | Centroide | t-test    | 0,66           | Islas - T.coquimbensis | Centroide | t-test    | 0,66          |
| Island - T.coquimbensis | PCL       | t-test    | 0,7            | Islas - T.coquimbensis | PCL       | t-test    | 0,9           |
| Island - T.coquimbensis | CDR       | t-test    | <b>0,02</b>    | Islas - T.coquimbensis | CDR       | t-test    | 0,4           |

|                                   |           |           |                |                                   |           |           |               |
|-----------------------------------|-----------|-----------|----------------|-----------------------------------|-----------|-----------|---------------|
| Island -<br>T.coquimbensis        | MRL       | t-test    | <b>0003</b>    | Islas -<br>T.coquimbensis         | MRL       | t-test    | 0,5           |
| Island -<br>T.coquimbensis        | ACW       | t-test    | <b>0,01</b>    | Islas -<br>T.coquimbensis         | ACW       | t-test    | 0,2           |
| Island -<br>T.coquimbensis        | PCW       | t-test    | 0,6            | Islas -<br>T.coquimbensis         | PCW       | t-test    | 0,7           |
| Island -<br>T.coquimbensis        |           | PERMANOVA | <b>0,002</b>   | Islas -<br>T.coquimbensis         |           | PERMANOVA | <b>0,04</b>   |
| LEFT SIDE                         |           |           |                | RIGHT SIDE                        |           |           |               |
| Comparation                       | Measure   | Analyses  | P              | Comparation                       | Measure   | Analyses  | P             |
| T. e. elegans -<br>T.coquimbensis | Ángulo A  | t-test    | <b>0,00008</b> | T. e. elegans -<br>T.coquimbensis | Ángulo A  | t-test    | <b>0,003</b>  |
| T. e. elegans -<br>T.coquimbensis | Ángulo B  | t-test    | <b>0,00009</b> | T. e. elegans -<br>T.coquimbensis | Ángulo B  | t-test    | <b>0,001</b>  |
| T. e. elegans -<br>T.coquimbensis | MP        | t-test    | 0,22           | T. e. elegans -<br>T.coquimbensis | MP        | t-test    | 0,42          |
| T. e. elegans -<br>T.coquimbensis | Centroide | t-test    | <b>0,026</b>   | T. e. elegans -<br>T.coquimbensis | Centroide | t-test    | <b>0,007</b>  |
| T. e. elegans -<br>T.coquimbensis | PCL       | t-test    | <b>0,003</b>   | T. e. elegans -<br>T.coquimbensis | PCL       | t-test    | <b>0,003</b>  |
| T. e. elegans -<br>T.coquimbensis | CDR       | t-test    | 0,27           | T. e. elegans -<br>T.coquimbensis | CDR       | t-test    | <b>0,05</b>   |
| T. e. elegans -<br>T.coquimbensis | MRL       | t-test    | 0,7            | T. e. elegans -<br>T.coquimbensis | MRL       | t-test    | <b>0,12</b>   |
| T. e. elegans -<br>T.coquimbensis | ACW       | t-test    | 0,5            | T. e. elegans -<br>T.coquimbensis | ACW       | t-test    | 0,2           |
| T. e. elegans -<br>T.coquimbensis | PCW       | t-test    | 0,6            | T. e. elegans -<br>T.coquimbensis | PCW       | t-test    | 0,3           |
| T. e. elegans -<br>T.coquimbensis |           | PERMANOVA | <b>0,002</b>   | T. e. elegans -<br>T.coquimbensis |           | PERMANOVA | <b>0,0003</b> |
| PEARON CORRELATION, LEFT SIDE     |           |           |                | PEARSON CORRELATION, RIGHT SIDE   |           |           |               |

|                                             |                |             |             |                                            |                |             |              |
|---------------------------------------------|----------------|-------------|-------------|--------------------------------------------|----------------|-------------|--------------|
| Island -<br>T.coquimbensis –<br>T e.elegans | CS – Bio<br>12 | Correlación | <b>0,04</b> | Islas -<br>T.coquimbensis –<br>T e.elegans | CS – Bio<br>12 | Correlación | <b>0,007</b> |
| Island -<br>T.coquimbensis –<br>T e.elegans | CS – Bio<br>1  | Correlación | 0,15        | Islas -<br>T.coquimbensis –<br>T e.elegans | CS – Bio<br>1  | Correlación | <b>0,002</b> |
| Island -<br>T.coquimbensis –<br>T e.elegans | CS –<br>NDVI   | Correlación | <b>0,03</b> | Islas -<br>T.coquimbensis –<br>T e.elegans | CS –<br>NDVI   | Correlación | <b>0,004</b> |

**Table S4.** Discriminant analysis with multivariate geometric morphometrics data. Left side.

|                     |               |                     |       |           |
|---------------------|---------------|---------------------|-------|-----------|
| $p = 0,0031$        |               |                     |       |           |
| group               | <b>island</b> | <b>coquimbensis</b> | Total | % Clasif. |
| <b>island</b>       | 8             | 5                   | 13    | 61,5      |
| <b>coquimbensis</b> | 3             | 1                   | 4     | 75        |

|                |               |                |       |           |
|----------------|---------------|----------------|-------|-----------|
| $p = 0,0001$   |               |                |       |           |
| group          | <b>island</b> | <b>elegans</b> | Total | % Clasif. |
| <b>islas</b>   | 12            | 1              | 13    | 92,3      |
| <b>elegans</b> | 1             | 23             | 24    | 95,8      |

|                    |                    |                |       |           |
|--------------------|--------------------|----------------|-------|-----------|
| 0,0625             |                    |                |       |           |
| group              | <b>coquimbensi</b> | <b>elegans</b> | Total | % Clasif. |
| <b>coquimbensi</b> | 2                  | 2              | 4     | 50        |
| <b>elegans</b>     | 11                 | 13             | 24    | 54,16     |

**Table S5.** Discriminant analysis with multivariate geometric morphometrics data. Right side

| $p = 0,0009$        |        |                     |       |           |
|---------------------|--------|---------------------|-------|-----------|
| group               | island | <i>coquimbensis</i> | Total | % Clasif. |
| island              | 13     | 1                   | 14    | 92,85     |
| <i>coquimbensis</i> | 1      | 4                   | 5     | 80        |

| $p = 0,0001$   |        |                |       |           |
|----------------|--------|----------------|-------|-----------|
| group          | island | <i>elegans</i> | Total | % Clasif. |
| island         | 11     | 3              | 14    | 78,57     |
| <i>elegans</i> | 1      | 25             | 26    | 96,15     |

| 0,1365             |                    |                |       |           |
|--------------------|--------------------|----------------|-------|-----------|
| group              | <i>coquimbensi</i> | <i>elegans</i> | Total | % Clasif. |
| <i>coquimbensi</i> | 2                  | 3              | 5     | 40        |
| <i>elegans</i>     | 6                  | 20             | 24    | 83,33     |

**Table S6.** Discriminant analyses with linear measurements. Left side

| % correctly classified, Jackknifed 77,08 |        |                     |                |       |
|------------------------------------------|--------|---------------------|----------------|-------|
|                                          | island | <i>coquimbensis</i> | <i>elegans</i> | Total |
| island                                   | 14     | 2                   | 1              | 17    |
| <i>Coquimbensis</i>                      | 0      | 3                   | 2              | 5     |
| <i>elegans</i>                           | 2      | 4                   | 20             | 26    |
| Total                                    | 16     | 9                   | 23             | 48    |

**Table S7.** Discriminant analyses with linear measurements. Right side

| % correctly classified, Jackknifed, 82,22 |               |                            |                       |       |
|-------------------------------------------|---------------|----------------------------|-----------------------|-------|
|                                           | <b>island</b> | <b><i>coquimbensis</i></b> | <b><i>elegans</i></b> | Total |
| <b>island</b>                             | 10            | 4                          | 0                     | 14    |
| <b><i>coquimbensis</i></b>                | 2             | 2                          | 1                     | 5     |
| <b><i>elegans</i></b>                     | 1             | 0                          | 25                    | 26    |
| <b>Total</b>                              | 13            | 6                          | 26                    | 45    |

**Figure S1.a.** Multivariate regression left side

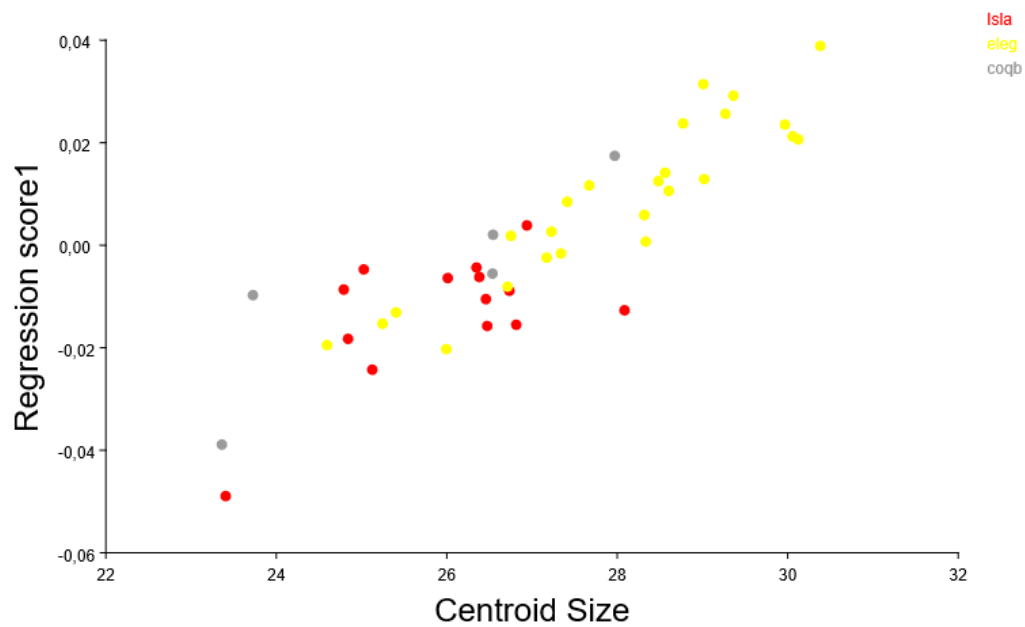

**Figure S1. b.** Multivariate regression right side

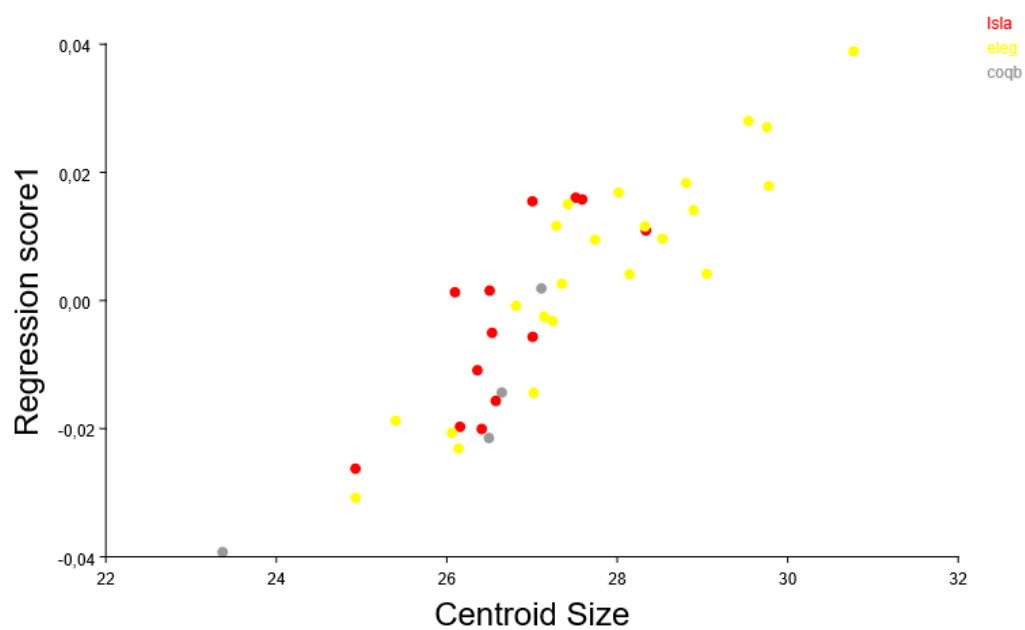



**Figure S2.a** Residual matrix, *Principal component analysis (PCA)* left side

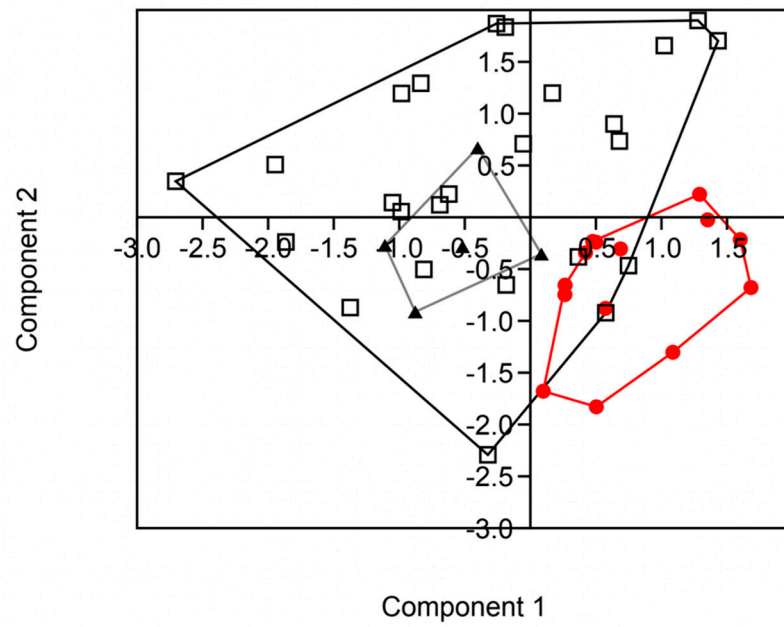

**Figure S2.b** Residual matrix, *Principal component analysis (PCA)* right side

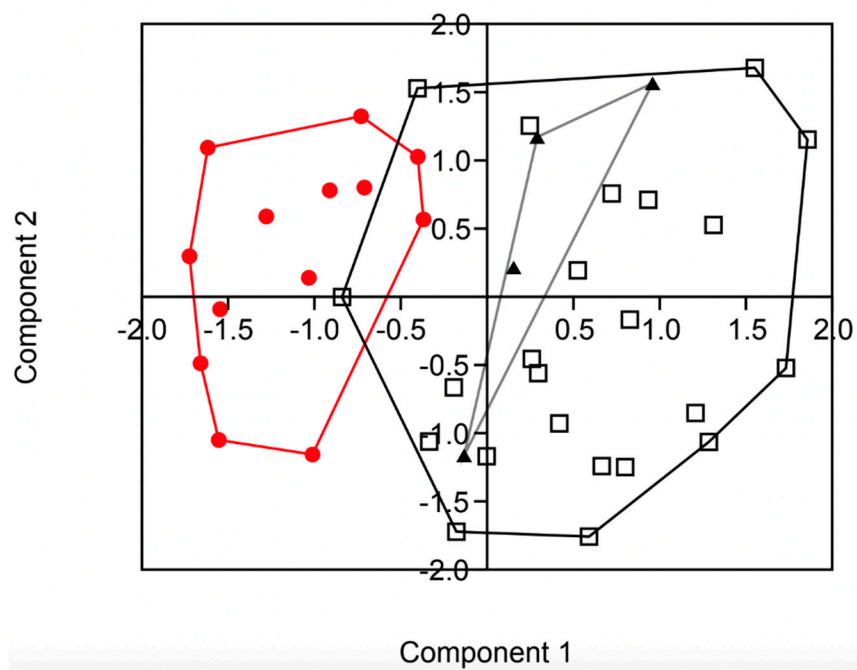

Supplement: s1 [file s1]
